# Supplementary material for: Selected serum cytokines and nitric oxide as potential multi-marker biosignature panels for Parkinson disease of varying durations: a case-control study
Source: PubMed Central journal article supplement (PMC6451214; doi:10.1186/s12883-019-1286-6), 2019-04-06
Supplement: 12883_2019_1286_MOESM1_ESM.pdf [file 12883_2019_1286_MOESM1_ESM.pdf]

**Immunologic markers in the progression of Parkinson disease**

**Questionnaire for the survey of demographic data, medical history, disease status and other factors of Parkinson and non-Parkinson individuals in the Colombo District, Sri Lanka.**

- This survey is carried out for an academic research by an undergraduate of University of Colombo.
- Confidentiality of all information is carefully guaranteed, and no information by which you can be identified will be released, presented or published. The data will never be used in such a way that you could be identified in any way.

Patient ID no: .....

Date: .....

**1. Subject Group**

- Parkinson Disease (PD)
- Other neurological disorders
- Normal healthy individuals

**Demographic data**

**2. Age:** .....years

**3. Sex :** Male / Female

**4. Residential address and Contact details**

.....

.....

.....

**5. Highest educational level**

GCE Ordinary Level.....

GCE Advanced Level.....

Graduate.....

Other (Specify).....

**6. Occupation (past / present)**

.....

**7. Past medical history**

Chronic diseases and duration

Diabetes mellitus.....

Hypertension.....

IHD.....

Malignancies.....

Neurological diseases (specify).....

Other (specify).....

Tobacco smoking – pack years (current or past).....

Alcohol intake – units per week x years (current or past).....

**8. Drug history**

Name of drug

Start date

.....

.....

.....

.....

**9. Family history of PD**

.....

.....

**10. Parkinson disease**

Date of onset of symptoms: .....

Duration since onset of symptoms: .....

Date of diagnosis: .....

Duration since diagnosis: .....

Diagnosed by Physician / Neurologist / other (specify): .....

**11. Motor symptoms**

| Motor symptoms       | Right | Left | Bilateral |
|----------------------|-------|------|-----------|
| Tremor               |       |      |           |
| Rigidity             |       |      |           |
| Bradykinesia         |       |      |           |
| Postural instability |       |      |           |
| Reduced arm swing    |       |      |           |
| Micrographia         |       |      |           |
| Mask face            |       |      |           |
| Freezing of gait     |       |      |           |
| Dyskinesia           |       |      |           |

**12. H-Y scale of disease**

| Hoehn and Yahr stage |                                                                                       |  |
|----------------------|---------------------------------------------------------------------------------------|--|
| Stage                | Description                                                                           |  |
| 0                    | No signs of disease                                                                   |  |
| 1                    | Unilateral disease                                                                    |  |
| 1.5                  | Unilateral plus axial involvement                                                     |  |
| 2                    | Bilateral disease without impairment of balance                                       |  |
| 2.5                  | Mild bilateral disease with recovery on pull test                                     |  |
| 3                    | Mild to moderate bilateral disease; some postural instability; physically independent |  |
| 4                    | Severe disability; still able to walk or stand unassisted                             |  |
| 5                    | Wheelchair bound or bedridden unless aided                                            |  |

**13. Non-motor complications**

|                                |  |
|--------------------------------|--|
| <b>Non-motor complications</b> |  |
| Memory impairment              |  |
| Hallucinations                 |  |
| Depression                     |  |
| Sleep disturbances             |  |
| Postural dizziness             |  |
| Constipation                   |  |
| Loss of smell                  |  |
